# Supplementary material
Source: Elsevier journal article supplement (https://www.sciencedirect.com/science/article/pii/S0025775319306311)
Supplement: mmc1 [file S0025775319306311:mmc1.docx]

Supplementary Table 1. Correlation Analysis of Bone Marrow Biopsy and PET-CT in Various Pathological Types of Lymphoma

| Pathological subtype |  | PET-CT positive | PET-CT negative | sensitivity | specificity | accuracy |
| --- | --- | --- | --- | --- | --- | --- |
| HL(N=15) | BMB positive | 0 | 0 | 0% | 46.7% | 46.7% |
|  | BMB negative | 8 | 7 |
| DLBCL(N=55) | BMB positive | 7 | 2 | 77.8% | 89.1% | 87.3% |
|  | BMB negative | 5 | 41 |
| High grade B-cell(N=4) | BMB positive | 1 | 0 | 100% | 100% | 100% |
|  | BMB negative | 0 | 3 |
| FL(N=24) | BMB positive | 3 | 5 | 37.5% | 87.5% | 70.8% |
|  | BMB negative | 2 | 14 |
| MCL(N=9) | BMB positive | 2 | 3 | 40% | 50% | 44.4% |
|  | BMB negative | 2 | 2 |
| MALT(N=7) | BMB positive | 2 | 1 | 66.7% | 100% | 85.7% |
|  | BMB negative | 0 | 4 |
| MZL(N=5) | BMB positive | 1 | 1 | 50% | 100% | 80% |
|  | BMB negative | 0 | 3 |
| PTCL(N=15) | BMB positive | 1 | 1 | 50% | 84.6% | 80% |
|  | BMB negative | 2 | 11 |
| NK/T(N=6) | BMB positive | 1 | 2 | 33.3% | 33.3% | 33.3% |
|  | BMB negative | 2 | 1 |
| ALCL(N=7) | BMB positive | 1 | 0 | 100% | 83.3% | 85.7% |
|  | BMB negative | 1 | 5 |
| AITL(N=6) | BMB positive | 1 | 0 | 100% | 100% | 100% |
|  | BMB negative | 0 | 5 |

BMB=bone marrow biopsy, HL=Hodgkin’s lymphoma, DLBCL=diffuse large B cell lymphoma, FL=follicular lymphoma, MCL=mantle cell lymphoma, MZL=marginal zone lymphoma, MALT=mucosa associated lymphoid tissue lymphoma.PTCL=peripheral T cell lymphoma,NK/T=NK/T cell lymphoma, ALCL=anaplastic large cell lymphoma, AITL=agio immunoblastic T cell lymphoma.
